# 1 **PLANT NATRIURETIC PEPTIDE A antagonizes salicylic acid-primed cell death**

2 Keun Pyo Lee<sup>1</sup>, Kaiwei Liu<sup>1,2</sup>, Eun Yu Kim<sup>3</sup>, Laura Medina-Puche<sup>1</sup>, Jianli Duan<sup>1</sup>, Yingrui Li<sup>1</sup>,  
3 Haihong Dong<sup>4,5</sup>, Ruiqing Lv<sup>1,2</sup>, Zihao Li<sup>1,2</sup>, Rosa Lozano-Duran<sup>1,2</sup>, Chanhong Kim<sup>1,2,a</sup>

4 <sup>1</sup> Shanghai Center for Plant Stress Biology and Center of Excellence in Molecular Plant Sciences,  
5 Chinese Academy of Sciences, Shanghai 200032, China.

6 <sup>2</sup> University of the Chinese Academy of Sciences, Beijing 100049, China.

7 <sup>3</sup> National Key Laboratory of Plant Molecular Genetics, CAS Center for Excellence in Molecular  
8 Plant Sciences, Shanghai Institute of Plant Physiology and Ecology, Chinese Academy of  
9 Sciences, Shanghai 200032, China

10 <sup>4</sup> Shanghai Key Laboratory of Plant Functional Genomics and Resources, Shanghai Chenshan  
11 Plant Science Research Center, Chinese Academy of Sciences, Shanghai Chenshan Botanical  
12 Garden, Shanghai 201602, China.

13 <sup>5</sup> College of Life Sciences, Shanghai Normal University, Shanghai 200234, China.

14 <sup>a</sup> Correspondence should be addressed to C.K. (chanhongkim@sibs.ac.cn)

## 15 **ABSTRACT**

16 Peptide hormones perceived in the cell surface via receptor proteins enable cell-to-cell  
17 communication and act in multiple biological processes through the activation of intracellular  
18 signaling. Even though Arabidopsis is predicted to have more than 1,000 secreted peptides, the  
19 biological relevance of the majority of these is yet to be established. Here, we demonstrate that  
20 PLANT NATRIURETIC PEPTIDE A (PNP-A), a functional analog to vertebrate atrial  
21 natriuretic peptides, antagonizes the salicylic acid (SA)-mediated cell death in the Arabidopsis  
22 *lesion-stimulating disease 1 (lsd1)* mutant. While loss of PNP-A potentiates SA signaling,  
23 exogenous application of the PNP-A synthetic peptide or overexpression of PNP-A significantly  
24 compromises the SA-mediated cell death. Moreover, we identified a plasma membrane-localized  
25 receptor-like protein, which we name PNP-AR (for PNP-A receptor), that binds PNP-A and is  
26 required to counteract SA responses. Our work identifies a novel peptide-receptor pair which  
27 modulates SA responses in Arabidopsis.

28

## 29 Introduction

30 As plants are multicellular organisms, cell-to-cell communication is crucial for growth,  
31 development, and survival under ever-changing environmental conditions. This intercellular  
32 communication is largely mediated by secreted signals such as phytohormones, reactive oxygen  
33 species (ROS), small RNAs, and small peptide hormones<sup>1</sup>. While genome sequencing and  
34 transcriptome data analyses have identified more than 1,000 potential peptide hormones in  
35 *Arabidopsis thaliana*<sup>2,3</sup>, only a few of them are functionally characterized, and even fewer have a  
36 cognate receptor assigned<sup>4-7</sup>. Most peptide hormones undergo post-translational modifications  
37 (PTMs), such as proteolytic processing, glycosylation, formation of intra-disulfide bonds, proline  
38 hydroxylation, hydroxyproline arabinosylation, and sulfation of tyrosine residues, during or upon  
39 their secretion into the apoplastic space<sup>3,5,7,8</sup>. These modifications enable recognition by specific  
40 receptors, such as receptor-like kinases (RLKs)<sup>9</sup> and receptor-like proteins (RLPs)<sup>10</sup>, on the  
41 surface of target cells, activating the relay of the signal into the cell interior<sup>4-6,11</sup>. In general,  
42 coupling of peptide-receptor results in transcriptional reprogramming, enabling the recipient cell  
43 to appropriately respond to an inbound factor following perception of the peptide secreted by the  
44 emitting cell. Like peptide hormones, the Arabidopsis genome also encodes hundreds of plasma  
45 membrane-associated RLKs and RLPs<sup>9,10</sup>. This diversity suggests a large number of potential  
46 peptide-receptor interactions that may facilitate the coordination and integration of multiple  
47 signaling pathways to modulate physiological processes following the perception of a broad  
48 range of external signals.

49 Plant natriuretic peptides (PNPs), functional analogs to vertebrate atrial natriuretic peptides  
50 (ANPs)<sup>12</sup>, are a novel type of peptide hormones that signal via guanosine 3',5'-cyclic  
51 monophosphate (cGMP)<sup>13-16</sup>. In animals, the synthesis of cGMP from guanosine triphosphate  
52 (GTP) is catalyzed by natriuretic peptide receptors (NPRs), which possess protein kinase (PK)  
53 and guanylyl cyclase (GC) activities, following perception of ANPs<sup>17</sup>. Like ANPs, upon  
54 secretion to the apoplast, PNPs undergo formation of inter-disulfide bonds and proteolytic  
55 processing<sup>15,17</sup>. Although PNPs have been shown to affect a broad spectrum of physiological  
56 responses in plants, including stomata opening<sup>14,18-20</sup>, regulation of photosynthetic efficiency and  
57 photorespiration<sup>19,21</sup>, cellular water and ion (Ca<sup>2+</sup>, H<sup>+</sup>, K<sup>+</sup> and Na<sup>+</sup>) homeostasis<sup>13,15,22</sup>, increase  
58 in protoplast volume<sup>14,15</sup>, modulation of their own expression<sup>23,24</sup> and resistance against biotic

59 and abiotic stresses<sup>20</sup>, their mode of action is largely unclear and their cognate receptor proteins  
60 are unknown.

61 In the present study, we found that *PNP-A*, but not its close homologue *PNP-B*, is  
62 transcriptionally upregulated in the Arabidopsis *lesion-simulating disease 1 (lsd1)* mutant prior  
63 to the onset of cell death, which requires NONEXPRESSER OF PR GENES 1 (NPR1), a key  
64 regulator of the salicylic acid (SA)-mediated signaling in plants<sup>25,26</sup>. The PNP-A processed  
65 (active) form is secreted into the apoplastic space and interacts with a previously uncharacterized  
66 plasma membrane-localized leucine-rich repeat RLP, named here PNPARG (for PNP-A Receptor),  
67 which is required for responses to PNP-A. While the lack of PNP-A or PNPARG potentiates the  
68 *lsd1*-conferred lesion-mimicking cell death, exogenous application or overexpression of PNP-A  
69 considerably compromises this response. In agreement with a role of PNP-A antagonizing SA  
70 responses, the exogenous treatment with this peptide results in increased susceptibility to a  
71 bacterial pathogen. Taken together, our results unveil a physiological function of the peptide  
72 hormone PNP-A as a negative modulator of SA signaling and identify PNPARG as its cognate  
73 receptor.

## 74 **Results**

### 75 **The secreted PNP-A peptide antagonizes SA-dependent plant responses**

76 We previously established a linear signaling pathway from SA to chloroplast-mediated  
77 programmed cell death, which largely contributes to the *lsd1*-conferred runaway cell death  
78 (hereafter *lsd1* RCD)<sup>27</sup>. The *lsd1* mutant, since its discovery in 1994<sup>28</sup>, has been utilized as a bio-  
79 tool to understand the molecular mechanisms underlying the regulation of cell death (especially  
80 the constraining mechanisms), because in this mutant cell death spontaneously increases in an  
81 uncontrolled manner<sup>29-31</sup>: several molecular components involved in SA-dependent signaling  
82 pathways, including NPR1, ENHANCED DISEASE SUSCEPTIBILITY 1 (EDS1), and  
83 PHYTOALEXIN DEFICIENT 4 (PAD4), have been identified as required for the *lsd1*  
84 RCD<sup>27,32,33</sup>. Recently, we carried out a global transcriptome analysis that revealed a substantial  
85 number of genes rapidly upregulated before the onset of the *lsd1* RCD<sup>27</sup>. Among them, we  
86 identified the transcript of the PNP-A peptide hormone, of which the mode of action and the  
87 cognate receptor remain to be elucidated in plants. Unlike the upregulation of *PNP-A*

88 (Supplementary Fig. 1a,b), the transcript of *PNP-B*, a *PNP-A* homolog, was undetectable in *lsdI*  
89 as well as wild-type (WT) plants, indicating the specificity of PNP-A toward the *lsdI* RCD.  
90 Because SA signaling primes the *lsdI* RCD<sup>27</sup> and *PNP-A* belongs to a group of SA-responsive  
91 genes<sup>34</sup>, next we examined whether SA and its key signaling component NPR1 regulate *PNP-A*  
92 expression. While *PNP-A* was clearly induced in WT plants upon SA treatment, it was not in  
93 *npr1* (Supplementary Fig. 1c), indicating that SA and its bona fide receptor NPR1 act to  
94 positively regulate the expression of *PNP-A*. Alongside with the notable attenuation of the *lsdI*  
95 RCD<sup>27</sup>, the loss of NPR1 in the *lsdI* background completely abrogated *PNP-A* expression  
96 (Supplementary Fig. 1d).

97 To explore the potential causal relationship between the rapid upregulation of *PNP-A* and  
98 the development of *lsdI* RCD, the plant phenotype resulting either from inactivation or  
99 overexpression of PNP-A was examined. For this, a *pnp-A* knockout mutant was crossed with  
100 *lsdI* to create the *lsdI pnp-A* double mutant plants, and two independent *lsdI* transgenic plants  
101 overexpressing *PNP-A* under the control of the *CaMV 35S* (35S) promoter were chosen based on  
102 the increased levels of *PNP-A* transcripts as compared to *lsdI* (Supplementary Fig. 2a,b). The  
103 genetic inactivation of PNP-A significantly facilitated the emergence of RCD, while its  
104 overexpression drastically attenuated the phenotype (Fig. 1a; Supplementary Fig. 3). The degrees  
105 of foliar cell death and chlorosis were evaluated by examining ion leakage and maximum  
106 photochemical efficiency of photosystem II (Fv/Fm), respectively (Fig. 1b,c). Given that  
107 overexpression of PNP-A significantly compromised the *lsdI* RCD, which is largely dependent  
108 on SA signaling, we anticipated that PNP-A might antagonize the SA-primed intercellular  
109 signaling. Reverse transcription quantitative PCR (RT-qPCR) to examine the expression level of  
110 genes involved in SA synthesis, signaling and/or responses, including *ISOCHORISMATE*  
111 *SYNTHASE 1* (*ICS1*), *EDS1*, *PAD4*, *PATHOGENESIS RELATED (PR)1*, and *PR2*, revealed that  
112 PNP-A overexpression markedly repressed the *lsdI*-induced SA signaling (Supplementary Fig.  
113 4). Based on this, we hypothesized that, upon secretion to the apoplastic space, PNP-A diffuses  
114 to adjacent cells and interacts with its cognate receptor to activate intracellular signaling,  
115 ultimately antagonizing SA-primed cell death responses. Even though PNP-A was previously  
116 suggested to be a secreted peptide hormone<sup>24</sup>, its presence in the apoplastic space has not been  
117 previously detected. To test this idea, we decided to examine the subcellular localization of PNP-

118 A fused to the GREEN FLUORESCENT PROTEIN (GFP) upon its transient expression driven  
119 by the 35S promoter in *Nicotiana benthamiana* leaves. Besides its post-translational modification  
120 (i.e. intra-disulfide bond formation between Cys42 and Cys65) in the apoplast, it was proposed  
121 that the PNP-A precursor is proteolytically processed to its active form, resembling what  
122 happens to the vertebrate ANP<sup>35,36</sup>. To avoid the cleavage of GFP, we fused the GFP with the  
123 truncated PNP-A (tPNP-A, Met1 to Tyr69) containing an N-terminal signal peptide (SP, Met1 to  
124 Lys29) and the putative active domain (Pro36 to Tyr69). The obtained confocal images clearly  
125 demonstrate that the tPNP-A-GFP protein is exclusively localized in the apoplastic space (Fig.  
126 1d).

127 The antagonizing impact of PNP-A on the *lsd1* RCD was further examined via a  
128 pharmacological approach by using synthesized active and dormant (scrambled) PNP-A peptides  
129 (for details on the synthetic peptides, see Supplementary Fig. 5). While no impact of the  
130 scrambled peptide was observed, the *lsd1* mutant plants treated with the active form of the PNP-  
131 A peptide exhibited drastically reduced RCD (Fig. 1d-f). Next, the impact of SA on plants  
132 deficient for or overexpressing PNP-A was analyzed. Exogenous application of high dosage of  
133 SA is known to greatly inhibit plant growth because of a trade-off effect<sup>37,38</sup>, i.e. an enhanced  
134 immune response limits plant growth or *vice versa*. It was clear that the negative impact of SA  
135 on plant growth was remarkably potentiated in *pnp-A* mutant plants, whereas it was less obvious  
136 in PNP-A overexpressing plants relative to WT (Fig. 2a,b), again pointing at a function of PNP-  
137 A in restricting SA responses.

### 138 **The PNP-A peptide physically interacts with the PM-localized LRR family protein PNPAR**

139 The vertebrate PNP analogues interact with GC-coupled protein receptors which catalyze the  
140 conversion of GTP into cGMP upon binding of the peptide<sup>17</sup>. The resulting increased cellular  
141 cGMP acts as a second messenger in the intracellular signal transduction mostly by activating  
142 kinases, which is implicated in ion channel conductance, glycogenolysis, relaxation of smooth  
143 muscle tissues, and inhibition of platelet aggregation<sup>39</sup>. In plants, cGMP is also a crucial  
144 signaling molecule involved in stress responses<sup>16,40,41</sup>, ion homeostasis through the regulation of  
145 cyclic nucleotide gated channels<sup>42,43</sup>, nitric oxide (NO)-dependent signaling<sup>44,45</sup>, hormonal  
146 signaling<sup>46,47</sup>, and phytochrome-dependent transcriptional regulation<sup>48</sup>. Importantly, it was

147 previously reported that PNP-A interacts with a novel leucine-rich repeat (LRR) protein, namely  
148 PNP-R1, which is predicted to contain a putative N-terminal SP, a LRR N-terminal (LRRNT)  
149 domain, a transmembrane (TM) domain, two LRR domains, and a PK domain followed by a GC  
150 catalytic center at the C-terminus<sup>15</sup>. Since the TM domain is located between the LRRNT and the  
151 LRR domains, this prediction implies that the LRR, PK and GC domains face the cytosol,  
152 whereas the LRRNT domain protrudes toward the extracellular space, or vice versa. However, to  
153 our surprise, when the deduced amino acid sequence of the PNP-R1 was subjected to a search for  
154 conserved domains by using several bioinformatics tools, including TMHMM server v. 2.0<sup>49</sup>,  
155 Phobius program<sup>50</sup>, NCBI's Conserved Domain Database<sup>51</sup> and InterPro<sup>52</sup>, the TM domain was  
156 not identified. Moreover, neither the PK nor the GC catalytic domains were predicted. Given that  
157 several plant GCs have low sequence homology with the annotated GCs of other organisms<sup>53</sup>,  
158 the GC catalytic center of PNP-R1 had been identified on the basis of non-canonical sequences<sup>15</sup>.  
159 While it was shown that PNP-R1 possesses *in vitro* GC activity<sup>15</sup>, so far there is no experimental  
160 evidence for its kinase activity.

161 In our system (i.e. *lsd1* mutant background), we could not identify the GC-containing  
162 receptor protein as a putative PNP-A-interacting protein through pull-down with biotin-  
163 conjugated PNP-A peptide coupled to mass spectrometry analysis (Supplementary Table 1).  
164 Instead, we found a typical receptor-like protein, which is predicted to contain a SP, an LRRNT  
165 domain followed by nine LRRs, and a TM domain, but lacking cytosolic activation domain (e.g.  
166 kinase) (Fig. 3a). Here, we tentatively named this RLP PNP-A receptor protein (PNPAR,  
167 At5g12940). The fluorescent signal (red) of the FM4-64 dye co-localizes with the fluorescence  
168 signal (yellow) of PNPAR-YFP, and both signals were retained in the plasma membrane (PM)  
169 after plasmolysis (Fig. 3b), indicating that PNPAR is localized to PM. Biomolecular  
170 fluorescence complementation (BiFC), *in vitro* pull-down, and co-immunoprecipitation analysis  
171 in *N. benthamiana* leaves substantiated the direct interaction between PNP-A and PNPAR (Fig.  
172 3c-e).

### 173 **PNPAR is required for the PNP-A-mediated repression of SA responses**

174 To further corroborate that PNPAR is a bona fide receptor of PNP-A, two knockout mutant  
175 alleles of *PNPAR* (*pnpa-1* and *pnpa-2*; Fig. 4a) were crossed with *lsd1* plants to create two



176 independent *pnpar lsd1* double mutants. The genetic inactivation of *pnpar* in *lsd1* revealed a  
177 probable genetic interaction between PNP-A and PNP-AR, which was evident from the  
178 potentiated foliar cell death and chlorosis as well as the significant decrease of Fv/Fm in the both  
179 *lsd1 pnpar-1* and *lsd1 pnpar-2* double mutant plants as compared to *lsd1* (Fig. 4b-e). The  
180 enhanced RCD phenotype in *pnpar lsd1* plants was accompanied by the heightened expression  
181 of *PR1* and *PR2* (Fig. 4f), implying that intracellular immune responses seem to be reinforced in  
182 the absence of PNP-AR. By contrast, a *lsd1 pnpr-1* double mutant showed equivalent degrees of  
183 RCD and expression of *PR1* and *PR2* as compared to those of *lsd1* (Fig. 4b-f), suggesting that  
184 PNP-R1 is not involved in the *lsd1* RCD or immune responses. In addition, unlike *lsd1* and *lsd1*  
185 *pnpr-A*, in which the active PNP-A synthetic peptide led to the attenuation of the *lsd1* RCD, the  
186 *lsd1 pnpar* double mutant plants were insensitive to this treatment (Fig. 5a-c). Conversely, *pnpar*  
187 mutant plants exhibited an extreme sensitivity to exogenously applied SA, like *pnpr-A* (Fig. 5d,e),  
188 as shown by the drastic growth inhibition and chlorosis, supporting the biological function of the  
189 PNP-A/PNP-AR pair in curtailing SA responses.

190 Recently, the response of plants overexpressing *Arabidopsis* PNP-A to a bacterial  
191 pathogen was examined: the results show that PNP-A potentiates the expression of defense-  
192 related genes, including *PR1*, conferring increased resistance to *Pseudomonas syringae* pv.  
193 *tomato* (*Pst*) DC3000 infection<sup>20</sup>. This is, however, inconsistent with our finding that PNP-A  
194 negatively regulates the expression of *PR* genes along with other SA-responsive genes in *lsd1*.  
195 For such reason, we decided to examine whether PNP-A affects host resistance against *Pst*  
196 DC3000 in our experimental system. As shown in Fig. 6a, exogenous application of the PNP-A  
197 synthetic peptide, but not of the scrambled peptide, enhanced susceptibility to *Pst* DC3000,  
198 providing another evidence that PNP-A negatively regulates plant defense responses. Moreover,  
199 the *pnpar* mutant was insensitive to the PNP-A synthetic peptide, unlike the *pnpr-1* mutant (Fig.  
200 6b). Taken together, our results strongly suggest that the PNP-A/PNP-AR-mediated intracellular  
201 signaling counteracts SA responses, which has a pivotal role in the modulation of defense  
202 responses<sup>54</sup>.

## 203 Discussion

204 The *PNP-A* gene is transcriptionally upregulated in response to abiotic stresses including UV-B,  
205 salt, osmotic, nutrient deficiencies, and ozone<sup>55</sup>, indicating that PNP-A may modulate plant  
206 responses to a multitude of environmental factors. We found that *PNP-A* was also upregulated in  
207 *lsd1* mutant plants prior to the onset of RCD (Supplementary Fig. 1a,b) which is known to be  
208 spread in an uncontrolled manner by various biotic and abiotic factors, such as excess light, red  
209 light, UV radiation, root hypoxia, cold and bacterial infection<sup>28,32,56-60</sup>.

210 Since this *lsd1* RCD is mediated by molecular components, such as EDS1, PAD4 and  
211 NPR1, involved in SA accumulation and the SA-dependent systemic acquired resistance (SAR)  
212 pathway<sup>27,32,33</sup>, it is reasonable to assume that PNP-A-mediated intercellular signaling  
213 participates in the regulation of the spread of cell death in *lsd1* that results from inappropriately  
214 induced SA-dependent plant defense/immune responses. In fact, a large-scale co-expression  
215 analysis indicates that PNP-A is highly co-expressed with genes associated with the SAR  
216 pathway<sup>55</sup>. A previous proteomic analysis of plant cells treated with synthetic Arabidopsis PNP-  
217 A peptide also demonstrates that PNP-A affects the abundance of proteins involved in cellular  
218 oxidation-reduction processes and in responses to biotic and abiotic stresses<sup>61</sup>.

219 In this study, we reveal a molecular pathway by which the PNP-A peptide hormone  
220 negatively regulates SA-mediated plant immune responses. Upon SA- and NPR1-dependent  
221 transcriptional upregulation of *PNP-A* (Supplementary Fig. 1c,d), the apoplastic PNP-A peptide  
222 physically interacts with its PM-localized cognate receptor protein PNP-AR (Fig. 3). The PNP-  
223 A/PNP-AR pair acts to inhibit SA signaling, antagonizing the SA-triggered RCD in the *lsd1*  
224 mutant (Figs 1 and 4), as well as the SA-dependent growth retardation (Figs 2 and 5) and  
225 increasing the plant susceptibility to a virulent bacterial pathogen (Fig. 6). Another kind of  
226 intercellular signaling molecules, ROS produced by PM-associated Arabidopsis respiratory burst  
227 oxidase (AtRBOH) family proteins, can also antagonize SA-dependent signaling to restrict the  
228 spread of cell death in the *lsd1* mutant and upon infection of avirulent bacterial pathogens<sup>62</sup>.  
229 Therefore, both of these systems may play an important role in fine-tuning plant immune  
230 responses to avoid inappropriate induction of SA-dependent death signals in cells spatially  
231 separated from infected or damaged cells, thereby minimizing tissue damage.



232 It has to be noted that the RLP PNP-AR lacks an intracellular domain with enzymatic  
233 activity (Fig. 3a). Because RLPs frequently act coordinately with other LRR proteins harboring  
234 intracellular signaling domains to perceive extracellular peptide signals and instigate intracellular  
235 signaling<sup>11,63,64</sup>, we hypothesize that PNP-AR may form a complex with a co-receptor protein,  
236 e.g. an LRR-RLK, to relay the signal upon recognition of the PNP-A peptide. Therefore, finding  
237 the potential co-receptor of PNP-AR will be essential to unveil downstream signaling components,  
238 paving the way for the eventual full dissection of the PNP-A signaling pathway.

## 239 **Methods**

### 240 **Plant materials and growth conditions**

241 All the *Arabidopsis* genotypes used in this study are Columbia (Col-0) ecotype. *Arabidopsis*  
242 mutant seeds of *lsd1-2* (SALK\_042687)<sup>27</sup>, *pnp-A* (SALK\_000951)<sup>15,20</sup>, *npr1* (SALK\_204100),  
243 *pnp-1* (GABIseq\_255A11.1), *pnp-2* (SALKseq\_6749.3), and *pnp-r1* (GABI-  
244 KAT\_180G04)<sup>15</sup> were obtained from the Nottingham Arabidopsis Stock Centre (NASC). We  
245 generated and genotyped double mutants by crossing homozygous single mutant plants and using  
246 appropriate primers (Supplementary Table 2). Seeds were surface sterilized by soaking in 1.6 %  
247 hypochlorite solution for 10 min, followed by washing five times with sterile water. Seeds were  
248 then plated on Murashige and Skoog (MS) medium (Duchefa Biochemie) containing 0.65% (w/v)  
249 agar (Duchefa Biochemie). After a three-day stratification at 4°C in darkness, seeds were placed  
250 in a growth chamber (CU-41L4; Percival Scientific) under continuous light condition. The light  
251 intensity was maintained at 100  $\mu\text{mol}\cdot\text{m}^{-2}\cdot\text{s}^{-1}$  at 22 °C  $\pm$  2°C. For pathogen infection assays,  
252 plants were grown on jiffy pellets in a controlled-environment chamber under short-day  
253 conditions (8 h light/16 h dark cycle) at 20-22 °C.

### 254 **Generation of PNP-A overexpression lines**

255 The stop codon-less *PNP-A* coding sequence (CDS) was cloned into a pDONR221 Gateway  
256 vector (Thermo Scientific) via a Gateway BP reaction (Thermo Scientific) and subsequently  
257 recombined into the Gateway-compatible plant binary vector pGWB651<sup>65</sup> via a Gateway LR  
258 reaction (Thermo Scientific). The generated vector was transformed into the *Agrobacterium*  
259 *tumefaciens* strain GV3101 using the heat shock method. After generating *Arabidopsis*  
260 transgenic plants in WT background using *Agrobacterium*-mediated transformation by the floral

261 dip method<sup>66</sup>, homozygous T3 transgenic plants were selected on MS medium containing  
262 12.5mg/l Basta (Sigma).

### 263 **RNA extraction and reverse transcription quantitative PCR (RT-qPCR)**

264 Total RNA (1ug) extracted from foliar tissues, using the Spectrum Plant Total RNA Kit (Sigma-  
265 Aldrich) was reverse-transcribed with the HiScript II Q RT SuperMix for qPCR (Vazyme  
266 Biotech) according to the manufacturer's recommendations. The RT-qPCR was conducted in  
267 triplicates on a QuantStudio<sup>TM</sup> 6 Flex Real-Time PCR System (Applied Biosystems) with SYBR  
268 Green Master Mix (Vazyme Biotech). Relative transcript levels were calculated by the ddCt  
269 method<sup>67</sup> and normalized to the *ACTIN2* (At3g18780) transcript level. The sequences of the  
270 primers used in this study are listed in Supplementary Table 2.

### 271 **Bimolecular fluorescence complementation (BiFC) assay**

272 BiFC assays were performed with a split-YFP system in *N. benthamiana* leaves as described  
273 previously<sup>68</sup>. In brief, the pDONR/Zeo entry vectors (Thermo Scientific) containing the 207 bp  
274 fragment of *PNP-A* CDS (counted from start codon) and the stop codon-less full CDS of *PNPAR*  
275 were recombined into the split-YFP vectors pGTQL1211YN and 1221YC, respectively, through  
276 a Gateway LR reaction (Thermo Scientific). For the BiFC assay, *A. tumefaciens* mixtures  
277 carrying the appropriate BiFC constructs were infiltrated with a 1 mL needle-less syringe into the  
278 abaxial side of 4-week-old *N. benthamiana* leaves. After 72 h, the presence of YFP signal was  
279 evaluated with a Leica TCS SP8 SMD (Leica Microsystems).

### 280 **Co-immunoprecipitation (Co-IP) assay**

281 For Co-IP assay, the pDONR/Zeo entry vector containing the 207 bp fragment of *PNP-A* CDS  
282 (*tPNP-A*; counted from start codon) or the stop codon-less full CDS of *PNPAR* was recombined  
283 into the destination vector pGWB651 for C-terminal fusion with GFP or pGWB617 for C-  
284 terminal fusion with 4xMYC through Gateway LR reaction (Thermo Scientific) to create  
285 *p35S:tPNP-A-GFP* and *p35S:PNPAR-4xMYC*. One or both of the vectors were expressed alone  
286 or co-expressed in 4-week-old *N. benthamiana* leaves after *Agrobacterium* infiltration. Total  
287 protein was extracted with IP buffer [50 mM Tris-HCl (pH 7.5), 150 mM NaCl, 10% glycerol,  
288 1.0 mM EDTA, 1% Triton X-100, 1mM Na<sub>2</sub>MoO<sub>4</sub>·2H<sub>2</sub>O, 1mM NaF, 1.5mM Na<sub>3</sub>VO<sub>4</sub>, 1mM

289 PMSF and 1x cOmplete protease inhibitor cocktail (Roche)]. After protein extraction, 20  $\mu$ L of  
290 Myc-Trap magnetic agarose beads (Myc-TrapMA, Chromotek) were incubated with 40 mg of  
291 the total protein extract for 12 h at 4 °C by vertical rotation. The beads were washed five times  
292 with washing buffer (IP buffer with 0.1% Triton X-100) and then eluted with 2x SDS protein  
293 sample buffer for 10 min at 95 °C. The eluates were subjected to 10% (w/v) SDS-PAGE gels and  
294 the interaction between co-expressed proteins determined by immunoblot analysis using a mouse  
295 anti-MYC monoclonal antibody (1:10,000; Cell Signaling Technology) and a mouse anti-GFP  
296 monoclonal antibody (1:5,000; Roche).

### 297 **Preparation of peptides**

298 N-terminal biotin-labeled PNP-A peptide and its scrambled peptide control were synthesized and  
299 purified to > 95 % purity on a high-pressure liquid chromatography (HPLC) by Sangon biotech  
300 (China). Peptides were dissolved in 20% acetic acid (1.5 mM stock solution) and diluted with  
301 distilled water to the desired concentrations before use. The amino acid sequences of peptides are  
302 shown in Supplementary Fig. 5.

### 303 **Peptide pull-down assay and mass spectrometry analysis.**

304 Twenty-day-old *lsd1* mutant plants grown under CL on MS medium were harvested and  
305 homogenized to a fine power in liquid nitrogen using a mortar and pestle. Approximately 10 g of  
306 fine power were used to extract total protein with the IP buffer as mentioned above. After protein  
307 extraction, 100ul of Dynabeads M-280 Streptavidin beads (Thermo Scientific) prebound with or  
308 without the N-terminal biotinylated PNP-A peptide or its scrambled peptide, were incubated with  
309 100 mg of the total protein extract for 12 h at 4 °C by vertical rotation. The beads were washed  
310 five times with the washing buffer (IP buffer with 0.1% Triton X-100) and then washed two  
311 times with 1x PBS buffer. After protein elution from the beads with SDT-lysis buffer [100mM  
312 Tris-HCl (pH7.6), 4% (w/v) SDS, 0.1M DTT], the eluates were subjected to mass spectrometry  
313 analysis as described previously<sup>69</sup>.

314 Pull-down assays were also conducted with *N. benthamiana* leaves harboring the  
315 *p35S:PNPAR-4xMYC* after *Agrobacterium* infiltration. Total protein was extracted with the IP  
316 buffer from 5 g of *N. benthamiana* leaves. After pull-down assay as described above, the eluates  
317 were subjected to NuPAGE Bis-Tris 4-12% protein gel (Thermo Scientific), and the interaction

318 between PNP-AR and the PNP-A synthetic peptide was determined by immunoblot analysis using  
319 a mouse anti-MYC monoclonal antibody (1:10,000; Cell Signaling Technology) and a mouse  
320 anti-biotin monoclonal antibody (1:2,000; Sigma).

### 321 **Subcellular localization and confocal laser-scanning microscopy (CLSM)**

322 The pDONR/Zeo entry vectors (Thermo Scientific) containing stop codon-less CDS of *PNPAR*  
323 was recombined into the destination vector pGWB641 for C-terminal fusion with YFP through a  
324 Gateway LR reaction (Thermo Scientific) to create *p35S:PNPAR-YFP*. To determine the  
325 subcellular localization of PNP-AR and tPNP-A, the *p35S:PNPAR-YFP* and *p35S:tPNP-A-GFP*  
326 constructs were transformed into *A. tumefaciens* strain GV3101 and transiently expressed in *N.*  
327 *benthamiana* leaves. The GFP, YFP, and FM4-64 fluorescence signals were detected by CLSM  
328 analysis using Leica TCS SP8 SMD (Leica Microsystems) 72 hours after infiltration. All the  
329 images were acquired and processed using the Leica LAS AF Lite software version 2.6.3 (Leica  
330 Microsystems). Cell plasmolysis was performed by treatment with 0.8 M mannitol for 30 min.

### 331 **Determination of cell death**

332 Cell death was visualized and quantified using trypan blue (TB) staining and electrolyte leakage  
333 measurements as previously described<sup>27</sup>. Briefly, first or second leaves from plants grown under  
334 CL on MS medium were submerged in TB staining solution (10 g phenol, 10 ml glycerol, 10 ml  
335 lactic acid and 0.02 g trypan blue in 10 ml H<sub>2</sub>O), diluted with ethanol 1:2 (v/v), and boiled for  
336 two min on a water bath. After a 16 h-incubation at room temperature on a vertical shaker, non-  
337 specific staining was removed with destaining buffer (250 g chloral hydrate in 100 ml H<sub>2</sub>O).  
338 Finally, plant tissues were kept in 50% (v/v) glycerol for imaging. For the measurement of  
339 electrolyte leakage, ten first or second leaves from independent plants were harvested at the  
340 indicated time points and transferred to a 15 ml tube containing 6 ml water purified using a  
341 Milli-Q integral 5 water purification system (Millipore). After a 6 h-incubation at room  
342 temperature on a horizontal shaker, conductivity of the solution was measured with an Orion Star  
343 A212 conductivity meter (Thermo Scientific). This experiment was repeated three times with  
344 similar results.

### 345 **Determination of maximum photochemical efficiency of Photosystem II (Fv/Fm)**

346 The Fv/Fm was determined with a FluorCam system (FC800-C/1010GFP; Photon Systems  
347 Instruments) containing a CCD camera and an irradiation system according to the instrument  
348 manufacturer's instructions.

#### 349 **Induced resistance**

350 Induced resistance assays were performed as described previously<sup>70</sup> with slight modifications.  
351 Briefly, 5  $\mu$ M solutions of the PNP-A peptide or its scrambled peptide control were infiltrated  
352 with a needleless syringe into the abaxial side of leaves of five-week-old short-day-grown  
353 Arabidopsis plants 6 h prior to bacterial infection (*Pseudomonas syringae* pv. *tomato* DC3000,  
354  $10^5$  cfu/ml). Bacterial growth was determined three days after inoculation by plating 1:10 serial  
355 dilutions of leaf extracts; plates were incubated at 28 °C for 2 days before bacterial cfu were  
356 counted. For each treatment, 7 mm leaf discs of three leaves from four independent plants  
357 were used.

#### 358 **Acknowledgements**

359 We thank the Core Facility of Proteomics, Shanghai Center for Plant Stress Biology (PSC) for  
360 carrying out mass spectrometry. We thank Junghee Lee for critical comments on the manuscript.  
361 This research was supported by the 100-Talents Program from the Chinese Academy of Sciences  
362 (CAS) to C.K., by National Natural Science Foundation of China (NSFC) Grant 31570264 to  
363 C.K., and by the Strategic Priority Research Program XDB27040102 from the CAS to C.K..

#### 364 **Author contributions**

365 K.P.L., K.L., E.Y.K., J.D., L.M.P., Y.L., H.D., R.L., and Z.L. conducted the experiments; K.P.L.,  
366 K.L., E.Y.K., J.D., L.M.P., R.L.D., and C.K. designed the research; K.P.L., K.L., E.Y.K., J.D.,  
367 L.M.P., R.L.D., and C.K. analyzed the data; K.P.L. and C.K. wrote the manuscript. All authors  
368 reviewed and edited the manuscript.

369 **Competing financial interests:** The authors declare no competing financial interests.

#### 370 **Additional information**

#### 371 **Figure and Table legends**

372 **Figure 1. PNP-A acts to repress *lsd1* RCD.** (a) Twenty two-days (d)-old plants of wild-type  
373 (WT), *lsd1*, *lsd1 pnp-A*, and two independent *35S:PNP-A lsd1* transgenic lines (#6-7, #16-7)  
374 grown under continuous light condition (CL) were collected to examine leaf RCD. First row: the  
375 RCD phenotype in the first or second leaves from the each genotype was visualized by trypan  
376 blue (TB) staining. Second row: the images of the first row were enlarged. (b,c) For  
377 measurements of ion leakage (b) and maximum photochemical efficiency of PSII (Fv/Fm) (c),  
378 first or second leaves from plants were harvested at the indicated time points. Ten leaves per  
379 genotype were used for each measurement. Data represent the means from three independent  
380 measurements. Error bars indicate standard deviation. (d) PNP-A is localized to the apoplastic  
381 space. Localization of the truncated PNP-A (tPNP-A, Met1 to Tyr69), including signal peptide  
382 (SP) and active region (AR), fused with GFP (PNPA-GFP) upon transient expression in *N.*  
383 *benthamiana* leaves. FM4-64 was used to stain plasma membrane (PM). Cell plasmolysis was  
384 performed by treatment of 0.8 M mannitol for 30 min. An asterisk indicates the apoplastic space  
385 formed by the shrinking protoplast, and triangles indicate the retracted PM. Scale bar = 20  $\mu$ m.  
386 (e-f) Seventeen-day-old WT and *lsd1* plants grown under CL were treated with water (Mock) or  
387 1  $\mu$ M scrambled or active form of AtPNP-A synthetic peptide. After 7 days of the treatment, the  
388 relative levels of foliar RCD were determined by TB staining (e), ion leakage (f) and Fv/Fm  
389 measurements (g). Data represent the means from three independent measurements. Error bars  
390 indicate standard deviation.

391 **Figure 2. PNP-A is required to counteract SA-mediated growth inhibition.** Twelve-day-old  
392 plants of WT, *pnp-A* and *p35S:PNP-A lsd1* (#6-7) grown on MS medium under CL were  
393 transferred to fresh MS medium containing the different concentrations of SA as indicated. The  
394 representative foliar phenotype (a) and plant size (b) of each genotype were shown. For the  
395 measurement of plant size, fifteen plants per genotype were used for each measurement. Data  
396 represent the means from three independent measurements. Error bars indicate SD. Lowercase  
397 letters indicate statistically significant differences between mean values ( $P < 0.05$ , one-way  
398 ANOVA with post-hoc Tukey's HSD test).

399 **Figure 3. PNP-A interacts with a novel plasma membrane-localized LRR receptor-like**  
400 **protein.** (a) Schematic illustration of the predicted domain structure and topology of the putative  
401 PNP-A-interacting LRR receptor, namely PNP-AR. The PNP-AR contains the extracellular



402 domains consisting of 9 LRRs and a LRRNT. SP indicates a signal peptide present at the N-  
403 terminus of PNP-AR and is responsible for targeting to plasma membrane (PM). TM marks the  
404 predicted transmembrane domain. **(b)** YFP fluorescence was observed in the PM when the YFP-  
405 tagged PNP-AR (PNP-AR-YFP) was expressed in *N. benthamiana* leaves. FM4-64 was used to  
406 stain PM. Cell plasmolysis was performed by treatment of 0.8 M mannitol for 30 min. In  
407 plasmolyzed cells, asterisks indicate the apoplastic space formed by the shrinking protoplast, and  
408 triangles indicate the retracted PM. Scale bar = 20  $\mu$ m. **(c)** Interaction of PNP-A with PNP-AR by  
409 biomolecular fluorescence complementation (BiFC) assay. YFP fluorescence was observed in  
410 the PM when the N-terminal part of YFP tagged with the truncated PNP-A (tPNP-A, Met1 to  
411 Tyr69 including SP and active region) (tPNP-A-YFP<sup>N</sup>) was coexpressed with the C-terminal part  
412 of the YFP tagged with PNP-AR (PNP-AR-YFP<sup>C</sup>) in *N. benthamiana* leaves. Scale bar = 20  $\mu$ m.  
413 **(d)** *In vitro* pull-down assay of N-terminally biotinylated active region of PNP-A synthetic  
414 peptide (B-PNP-A<sup>active</sup>) with PNP-AR fused with Myc tag (PNP-AR-Myc) upon transient  
415 expression in *N. benthamiana* leaves. N-terminally biotinylated-scrambled PNP-A peptide (B-  
416 PNP-A<sup>scrambled</sup>) was used as a negative control as it does not interact with PNP-AR. **(e)** Co-  
417 immunoprecipitation (Co-IP) of tPNP-A-GFP with PNP-AR-Myc upon transient coexpression in  
418 *N. benthamiana* leaves.

419 **Figure 4. PNP-AR is required to counteract SA-mediated *lsd1* RCD and immune responses.**

420 **(a)** The insertion positions of T-DNAs in two *Arabidopsis pnp-AR* mutant alleles, *pnp-AR-1* and  
421 *pnp-AR-2*. It should be noted that PNP-AR does not contain any intron. **(b)** WT, *lsd1*, *lsd1 pnp-AR-1*,  
422 *lsd1 pnp-AR-2* and *lsd1 pnp-r1* plants were grown under CL and the emergence and the spread of  
423 RCD were monitored at the indicated time points. The images of representative plants are shown  
424 at the same scale. **(c)** The degree of RCD in the leaves from each genotype grown under CL for  
425 22 days was visualized by TB staining. **(d,e)** For measurements of ion leakage **(d)** and Fv/Fm **(e)**,  
426 first or second leaves from each genotype grown under CL were harvested at the indicated time  
427 points. Ten leaves per genotype were used for each measurement. Data represent the means from  
428 three independent measurements. Error bars indicate standard deviation (SD). **(f)** The relative  
429 expression levels of *PR1* and *PR2* were determined using qRT-PCR. *ACT2* was used as an  
430 internal standard. The data represent the means of three independent biological replicates. Error

431 bars indicate SD. Lowercase letters indicate statistically significant differences between mean  
432 values ( $P < 0.01$ , one-way ANOVA with post-hoc Tukey's HSD test).

433 **Figure 5. *pnp-ar* mutant plants are insensitive to PNP-A and hypersensitive to SA. (a-c)**  
434 Seventeen-day-old plants of WT, *lsd1*, *lsd1 pnp-A* and *lsd1 pnp-ar-2* grown under CL were  
435 treated with PNP-A or scrambled peptides and kept for 7 days under CL. Afterward, the RCD  
436 phenotype (a), ion leakage (b) and Fv/Fm (c) were examined. The representative images are  
437 shown at the same scale. For the measurements of ion leakage and Fv/Fm, ten leaves per  
438 genotype were used for each measurement. Data represent the means from three independent  
439 measurements. Error bars indicate standard deviation (SD). (d,e) Twelve-day-old plants of WT,  
440 *pnp-A* and *pnp-ar-2* grown on MS medium under CL were transferred to MS medium in the  
441 absence (Mock) or presence of 0.2mM SA and kept for 18 days under same growth condition.  
442 The representative foliar phenotype (d) and plant size (e) of each genotype were shown. For the  
443 measurement of plant size, fifteen plants per genotype were used for each measurement. Data  
444 represent the means from three independent measurements. Error bars indicate SD. Lowercase  
445 letters in b, c and e indicate statistically significant differences between mean values ( $P < 0.05$ ,  
446 one-way ANOVA with post-hoc Tukey's HSD test).

447 **Figure 6. The PNP-A peptide enhances plant susceptibility to *P. syringae* pv. *tomato***  
448 **DC3000 in a PNP-A-dependent manner. (a,b)** Five-week-old short-day-grown plants of WT  
449 (a) and WT, *pnp-ar-2* and *pnp-r1* (b) were pre-treated with 5  $\mu$ M PNP-A synthetic peptide (PNP-  
450 A) or scrambled peptide (Scram.) control 6 h prior to bacterial infiltration. Three days later,  
451 bacteria were extracted from three different leaves of 4 independent plants and incubated at  
452 28 °C for 2 days to evaluate growth. Bars represent SE of  $n = 4$ . Lowercase letters indicate  
453 statistically significant differences between mean values ( $P < 0.001$ , one-way ANOVA with  
454 post-hoc Bonferroni's multiple comparison test). This experiment was repeated twice with  
455 similar results. CFU: colony-forming unit.

456 **Supplementary Figure 1. PNP-A is highly upregulated in *lsd1*.** (a) The transcript levels of  
457 *PNP-A* in 17-d and 19-d-old plants of wild-type (WT) and *lsd1* grown under continuous light  
458 condition (CL) were obtained from our previous RNA-Seq analysis<sup>27</sup>. cpm: count per million. (b)  
459 The transcript levels of *PNP-A* shown in a were confirmed by qRT-PCR. (c) WT and *npr1* plants

460 grown under CL were sprayed with a 0.5 mM solution of SA (+ SA) or with distilled water (-  
461 SA), and leaf samples were harvested at 12 hrs after the treatment. Expression level of *PNP-A*  
462 was examined using qRT-PCR. **(d)** Expression levels of *PNP-A* in WT, *lsd1* and *lsd1 npr1 (l/n1)*  
463 grown under CL were analyzed by qRT-PCR at the indicated time points. For the qRT-PCR  
464 analyses in **b**, **c**, and **d**, *ACT2* was used as an internal standard. The data represent the means of  
465 three independent biological replicates. Error bars indicate standard deviation. Lowercase letters  
466 indicate statistically significant differences between mean values ( $P < 0.01$ , one-way ANOVA  
467 with post-hoc Tukey's HSD test).

468 **Supplementary Figure 2. Two independent wild-type transgenic lines overexpressing PNP-**  
469 **A.** Transcript levels of *PNP-A* in two independent *lsd1* plants overexpressing *GFP*-tagged *PNP-*  
470 *A (PNP-A-GFP)* under the control of the *CaMV 35S* promoter. Semiquantitative RT-PCR **(a)** and  
471 quantitative RT-PCR **(b)** were carried out with total RNAs isolated from the 16-d-old CL-grown  
472 plants. *ACT2* was used as an internal standard. The data in **b** represent the means of three  
473 independent biological replicates. Error bars indicate standard deviation. Lowercase letters  
474 indicate statistically significant differences between mean values ( $P < 0.01$ , one-way ANOVA  
475 with post-hoc Tukey's HSD test).

476 **Supplementary Figure 3. Effect of loss of or overexpression of PNP-A on *lsd1* RCD.** WT,  
477 *lsd1*, *lsd1 pnp-A* and two PNP-A overexpression lines were grown under CL and the emergence  
478 and spread of RCD were monitored at the indicated time points. The images of representative  
479 plants are shown at the same scale.

480 **Supplementary Figure 4. PNP-A represses SA biosynthesis genes and SA-responsive genes.**  
481 WT, *lsd1*, *lsd1 pnp-A* and two PNP-A overexpression lines were grown under CL and expression  
482 levels of genes involved in SA biosynthesis (*ICS1*, *EDS1*, and *PAD4*) and SA response (*PR1* and  
483 *PR2*) were examined by qRT-PCR at the indicated time points. *ACT2* was used as an internal  
484 standard. The data represent the means of three independent biological replicates. Error bars  
485 indicate standard deviation.

486 **Supplementary Figure 5. Schematic illustration of domain structure of *Arabidopsis* PNP-A**  
487 **(AtPNP-A).** Signal peptide (1 to 29 amino acids) is responsible for targeting to extracellular  
488 space. Amino acids 36 to 69 indicate the active region of PNP-A that has significant biological

489 activity. The amino acid sequences of N-terminally biotinylated active region of synthetic  
490 AtPNP-A (Active) and scrambled peptides are represented. Red capital letter “C” indicates two  
491 cystein residues that form a disulfide bond, as indicated in a previous study<sup>15</sup>.

492 **Supplementary Table 1. List of proteins interacting PNP-A synthetic peptides.** Pull-down  
493 with N-terminal biotinylated PNP-A synthetic peptide coupled to mass spectrometry analysis  
494 (PNP-A pull-down/MS) was performed with total proteins extracted from *lsd1* mutant plants  
495 grown under continuous light on MS medium for 20 days. The pull-down/MS with N-terminally  
496 biotinylated scrambled PNP-A or without the synthetic peptides were also performed for  
497 negative controls. The PNP-A pull-down/MS repeated two times with independent biological  
498 samples. A total of 66 proteins were present in both biological replicates from the PNP-A pull-  
499 down/MS, but were absent in the negative controls.

500 **Supplementary Table 2. List of primer sets used in this study.**

## 501 References

- 502 1. Van Norman J. M., Breakfield N. W. & Benfey P. N. Intercellular communication during  
503 plant development. *Plant Cell*. **23**, 855-864 (2011).
- 504 2. Lease K. A. & Walker J. C. The Arabidopsis unannotated secreted peptide database, a  
505 resource for plant peptidomics. *Plant Physiol*. **142**, 831-838 (2006).
- 506 3. Matsubayashi Y. Posttranslationally Modified Small-Peptide Signals in Plants. *Annual*  
507 *Review of Plant Biology, Vol 65*. **65**, 385-413 (2014).
- 508 4. Butenko M. A., Vie A. K., Brembu T., Aalen R. B. & Bones A. M. Plant peptides in  
509 signalling: looking for new partners. *Trends Plant Sci*. **14**, 255-263 (2009).
- 510 5. Matsubayashi Y. Post-Translational Modifications in Secreted Peptide Hormones in  
511 Plants. *Plant Cell Physiol*. **52**, 5-13 (2011).
- 512 6. Murphy E., Smith S. & De Smet I. Small Signaling Peptides in Arabidopsis Development:  
513 How Cells Communicate Over a Short Distance. *Plant Cell*. **24**, 3198-3217 (2012).
- 514 7. Motomitsu A., Sawa S. & Ishida T. Plant peptide hormone signalling. *Essays Biochem*.  
515 **58**, 115-131 (2015).
- 516 8. Schardon K. *et al.* Precursor processing for plant peptide hormone maturation by  
517 subtilisin-like serine proteinases. *Science*. **354**, 1594-1597 (2016).
- 518 9. Shiu S. H. & Bleecker A. B. Receptor-like kinases from Arabidopsis form a  
519 monophyletic gene family related to animal receptor kinases. *P Natl Acad Sci USA*. **98**,  
520 10763-10768 (2001).
- 521 10. Wang G. D. *et al.* A genome-wide functional investigation into the roles of receptor-like  
522 proteins in Arabidopsis. *Plant Physiol*. **147**, 503-517 (2008).
- 523 11. Hirakawa Y., Torii K. U. & Uchida N. Mechanisms and Strategies Shaping Plant Peptide  
524 Hormones. *Plant Cell Physiol*. **58**, 1313-1318 (2017).

- 525 12. Ludidi N. N., Heazlewood J. L., Seoighe C., Irving H. R. & Gehring C. A. Expansin-like  
526 molecules: Novel functions derived from common domains. *J Mol Evol.* **54**, 587-594  
527 (2002).
- 528 13. Pharmawati M., Maryani M. M., Nikolakopoulos T., Gehring C. A. & Irving H. R. Cyclic  
529 GMP modulates stomatal opening induced by natriuretic peptides and immunoreactive  
530 analogues. *Plant Physiol Bioch.* **39**, 385-394 (2001).
- 531 14. Wang Y. H., Gehring C., Cahill D. M. & Irving H. R. Plant natriuretic peptide active site  
532 determination and effects on cGMP and cell volume regulation. *Funct Plant Biol.* **34**,  
533 645-653 (2007).
- 534 15. Turek I. & Gehring C. The plant natriuretic peptide receptor is a guanylyl cyclase and  
535 enables cGMP-dependent signaling. *Plant Mol Biol.* **91**, 275-286 (2016).
- 536 16. Gehring C. & Turek I. S. Cyclic Nucleotide Monophosphates and Their Cyclases in Plant  
537 Signaling. *Front Plant Sci.* **8**, (2017).
- 538 17. Potter L. R. & Hunter T. Guanylyl cyclase-linked natriuretic peptide receptors: Structure  
539 and regulation. *J Biol Chem.* **276**, 6057-6060 (2001).
- 540 18. Morse M., Pironcheva G. & Gehring C. AtPNP-A is a systemically mobile natriuretic  
541 peptide immunoanalogue with a role in Arabidopsis thaliana cell volume regulation. *Febs*  
542 *Lett.* **556**, 99-103 (2004).
- 543 19. Gottig N. *et al.* Xanthomonas axonopodis pv. citri uses a plant natriuretic peptide-like  
544 protein to modify host homeostasis. *P Natl Acad Sci USA.* **105**, 18631-18636 (2008).
- 545 20. Ficarra F. A., Grandellis C., Garavaglia B. S., Gottig N. & Ottado J. Bacterial and plant  
546 natriuretic peptides improve plant defence responses against pathogens. *Mol Plant Pathol.*  
547 **19**, 801-811 (2018).
- 548 21. Ruzvidzo O., Donaldson L., Valentine A. & Gehring C. The Arabidopsis thaliana  
549 natriuretic peptide AtPNP-A is a systemic regulator of leaf dark respiration and signals  
550 via the phloem. *J Plant Physiol.* **168**, 1710-1714 (2011).
- 551 22. Ludidi N. *et al.* A recombinant plant natriuretic peptide causes rapid and spatially  
552 differentiated K<sup>+</sup>, Na<sup>+</sup> and H<sup>+</sup> flux changes in Arabidopsis thaliana roots. *Plant Cell*  
553 *Physiol.* **45**, 1093-1098 (2004).
- 554 23. Wang Y. H., Donaldson L., Gehring C. & Irving H. R. Plant natriuretic peptides: control  
555 of synthesis and systemic effects. *Plant Signal Behav.* **6**, 1606-1608 (2011).
- 556 24. Wang Y. H., Gehring C. & Irving H. R. Plant Natriuretic Peptides are Apoplastic and  
557 Paracrine Stress Response Molecules. *Plant Cell Physiol.* **52**, 837-850 (2011).
- 558 25. Cao H., Glazebrook J., Clarke J. D., Volko S. & Dong X. N. The Arabidopsis NPR1 gene  
559 that controls systemic acquired resistance encodes a novel protein containing ankyrin  
560 repeats. *Cell.* **88**, 57-63 (1997).
- 561 26. Zhang Y. L., Fan W. H., Kinkema M., Li X. & Dong X. N. Interaction of NPR1 with  
562 basic leucine zipper protein transcription factors that bind sequences required for salicylic  
563 acid induction of the PR-1 gene. *P Natl Acad Sci USA.* **96**, 6523-6528 (1999).
- 564 27. Lv R. *et al.* Uncoupled Expression of Nuclear and Plastid Photosynthesis-associated  
565 Genes Contributes to Cell Death in a Lesion Mimic Mutant. *Plant Cell.* (2019).
- 566 28. Dietrich R. A. *et al.* Arabidopsis Mutants Simulating Disease Resistance Response. *Cell.*  
567 **77**, 565-577 (1994).
- 568 29. Jabs T., Dietrich R. A. & Dangl J. L. Initiation of runaway cell death in an Arabidopsis  
569 mutant by extracellular superoxide. *Science.* **273**, 1853-1856 (1996).



- 570 30. Dietrich R. A., Richberg M. H., Schmidt R., Dean C. & Dangl J. L. A novel zinc finger  
571 protein is encoded by the arabidopsis LSD1 gene and functions as a negative regulator of  
572 plant cell death. *Cell*. **88**, 685-694 (1997).
- 573 31. Kliebenstein D. J., Dietrich R. A., Martin A. C., Last R. L. & Dangl J. L. LSD1 regulates  
574 salicylic acid induction of copper zinc superoxide dismutase in *Arabidopsis thaliana*. *Mol*  
575 *Plant Microbe In.* **12**, 1022-1026 (1999).
- 576 32. Rusterucci C., Aviv D. H., Holt B. F., Dangl J. L. & Parker J. E. The disease resistance  
577 signaling components EDS1 and PAD4 are essential regulators of the cell death pathway  
578 controlled by LSD1 in arabidopsis. *Plant Cell*. **13**, 2211-2224 (2001).
- 579 33. Aviv D. H. *et al.* Runaway cell death, but not basal disease resistance, in *Isd1* is SA- and  
580 NIM1/NPR1-dependent. *Plant J.* **29**, 381-391 (2002).
- 581 34. Wang D., Amornsiripanitch N. & Dong X. N. A genomic approach to identify regulatory  
582 nodes in the transcriptional network of systemic acquired resistance in plants. *Plos*  
583 *Pathog.* **2**, 1042-1050 (2006).
- 584 35. Schwartz D. *et al.* Ser-Leu-Arg-Arg-atrioepetin III: the major circulating form of atrial  
585 peptide. *Science*. **229**, 397-400 (1985).
- 586 36. Koller K. J. & Goeddel D. V. Molecular-Biology of the Natriuretic Peptides and Their  
587 Receptors. *Circulation*. **86**, 1081-1088 (1992).
- 588 37. Vicente M. R. S. & Plasencia J. Salicylic acid beyond defence: its role in plant growth  
589 and development. *J Exp Bot.* **62**, 3321-3338 (2011).
- 590 38. Karasov T. L., Chae E., Herman J. J. & Bergelson J. Mechanisms to Mitigate the Trade-  
591 Off between Growth and Defense. *Plant Cell*. **29**, 666-680 (2017).
- 592 39. Scott J. D. Cyclic Nucleotide-Dependent Protein-Kinases. *Pharmacol Therapeut.* **50**,  
593 123-145 (1991).
- 594 40. Durner J., Wendehenne D. & Klessig D. F. Defense gene induction in tobacco by nitric  
595 oxide, cyclic GMP, and cyclic ADP-ribose. *P Natl Acad Sci USA*. **95**, 10328-10333  
596 (1998).
- 597 41. Donaldson L., Ludidi N., Knight M. R., Gehring C. & Denby K. Salt and osmotic stress  
598 cause rapid increases in *Arabidopsis thaliana* cGMP levels. *Febs Lett.* **569**, 317-320  
599 (2004).
- 600 42. Hoshi T. Regulation of Voltage-Dependence of the Kat1 Channel by Intracellular Factors.  
601 *J Gen Physiol.* **105**, 309-328 (1995).
- 602 43. Leng Q., Mercier R. W., Yao W. Z. & Berkowitz G. A. Cloning and first functional  
603 characterization of a plant cyclic nucleotide-gated cation channel. *Plant Physiol.* **121**,  
604 753-761 (1999).
- 605 44. Neill S. J., Desikan R. & Hancock J. T. Nitric oxide signalling in plants. *New Phytol.* **159**,  
606 11-35 (2003).
- 607 45. Neill S. *et al.* Nitric oxide, stomatal closure, and abiotic stress. *J Exp Bot.* **59**, 165-176  
608 (2008).
- 609 46. Penson S. P. *et al.* cGMP is required for gibberellic acid-induced gene expression in  
610 barley aleurone. *Plant Cell*. **8**, 2325-2333 (1996).
- 611 47. Zhao Y. C., Qi Z. & Berkowitz G. A. Teaching an Old Hormone New Tricks: Cytosolic  
612 Ca<sup>2+</sup> Elevation Involvement in Plant Brassinosteroid Signal Transduction Cascades.  
613 *Plant Physiol.* **163**, 555-565 (2013).



- 614 48. Bowler C., Yamagata H., Neuhaus G. & Chua N. H. Phytochrome Signal-Transduction  
615 Pathways Are Regulated by Reciprocal Control Mechanisms. *Gene Dev.* **8**, 2188-2202  
616 (1994).
- 617 49. Krogh A., Larsson B., von Heijne G. & Sonnhammer E. L. L. Predicting transmembrane  
618 protein topology with a hidden Markov model: Application to complete genomes. *J Mol*  
619 *Biol.* **305**, 567-580 (2001).
- 620 50. Kall L., Krogh A. & Sonnhammer E. L. L. A combined transmembrane topology and  
621 signal peptide prediction method. *J Mol Biol.* **338**, 1027-1036 (2004).
- 622 51. Marchler-Bauer A. *et al.* CDD/SPARCLE: functional classification of proteins via  
623 subfamily domain architectures. *Nucleic Acids Res.* **45**, D200-D203 (2017).
- 624 52. Finn R. D. *et al.* InterPro in 2017-beyond protein family and domain annotations. *Nucleic*  
625 *Acids Res.* **45**, D190-D199 (2017).
- 626 53. Ludidi N. & Gehring C. Identification of a novel protein with guanylyl cyclase activity in  
627 *Arabidopsis thaliana*. *J Biol Chem.* **278**, 6490-6494 (2003).
- 628 54. Dempsey D. A., Shah J. & Klessig D. F. Salicylic acid and disease resistance in plants.  
629 *Crit Rev Plant Sci.* **18**, 547-575 (1999).
- 630 55. Meier S. *et al.* Co-expression and promoter content analyses assign a role in biotic and  
631 abiotic stress responses to plant natriuretic peptides. *Bmc Plant Biol.* **8**, (2008).
- 632 56. Mateo A. *et al.* LESION SIMULATING DISEASE 1 is required for acclimation to  
633 conditions that promote excess excitation energy. *Plant Physiol.* **136**, 2818-2830 (2004).
- 634 57. Muhlenbock P. *et al.* Chloroplast signaling and LESION SIMULATING DISEASE1  
635 regulate crosstalk between light acclimation and immunity in *Arabidopsis*. *Plant Cell.* **20**,  
636 2339-2356 (2008).
- 637 58. Huang X., Li Y., Zhang X., Zuo J. & Yang S. The *Arabidopsis* LSD1 gene plays an  
638 important role in the regulation of low temperature-dependent cell death. *New Phytol.*  
639 **187**, 301-312 (2010).
- 640 59. Chai T., Zhou J., Liu J. & Xing D. LSD1 and HY5 antagonistically regulate red light  
641 induced-programmed cell death in *Arabidopsis*. *Front Plant Sci.* **6**, 292 (2015).
- 642 60. Wituszynska W. *et al.* Lesion simulating disease 1 and enhanced disease susceptibility 1  
643 differentially regulate UV-C-induced photooxidative stress signalling and programmed  
644 cell death in *Arabidopsis thaliana*. *Plant Cell Environ.* **38**, 315-330 (2015).
- 645 61. Turek I., Marondedze C., Wheeler J. I., Gehring C. & Irving H. R. Plant natriuretic  
646 peptides induce proteins diagnostic for an adaptive response to stress. *Front Plant Sci.* **5**,  
647 (2014).
- 648 62. Torres M. A., Jones J. D. & Dangl J. L. Pathogen-induced, NADPH oxidase-derived  
649 reactive oxygen intermediates suppress spread of cell death in *Arabidopsis thaliana*. *Nat*  
650 *Genet.* **37**, 1130-1134 (2005).
- 651 63. Jeong S., Trotochaud A. E. & Clark S. E. The *Arabidopsis* CLAVATA2 gene encodes a  
652 receptor-like protein required for the stability of the CLAVATA1 receptor-like kinase.  
653 *Plant Cell.* **11**, 1925-1933 (1999).
- 654 64. Nadeau J. A. & Sack F. D. Control of stomatal distribution on the *Arabidopsis* leaf  
655 surface. *Science.* **296**, 1697-1700 (2002).
- 656 65. Nakagawa T. *et al.* Improved gateway binary vectors: High-performance vectors for  
657 creation of fusion constructs in Transgenic analysis of plants. *Biosci Biotech Bioch.* **71**,  
658 2095-2100 (2007).

- 659 66. Clough S. J. & Bent A. F. Floral dip: a simplified method for *Agrobacterium*-mediated  
660 transformation of *Arabidopsis thaliana*. *Plant J.* **16**, 735-743 (1998).
- 661 67. Livak K. J. & Schmittgen T. D. Analysis of relative gene expression data using real-time  
662 quantitative PCR and the 2(T)(-Delta Delta C) method. *Methods.* **25**, 402-408 (2001).
- 663 68. Lu Q. *et al.* *Arabidopsis* homolog of the yeast TREX-2 mRNA export complex:  
664 components and anchoring nucleoporin. *Plant J.* **61**, 259-270 (2010).
- 665 69. Wang L. S. *et al.* Singlet oxygen- and EXECUTER1-mediated signaling is initiated in  
666 grana margins and depends on the protease FtsH2. *P Natl Acad Sci USA.* **113**, E3792-  
667 E3800 (2016).
- 668 70. Lozano-Duran R. *et al.* The transcriptional regulator BZR1 mediates trade-off between  
669 plant innate immunity and growth. *Elife.* **2**, e00983 (2013).

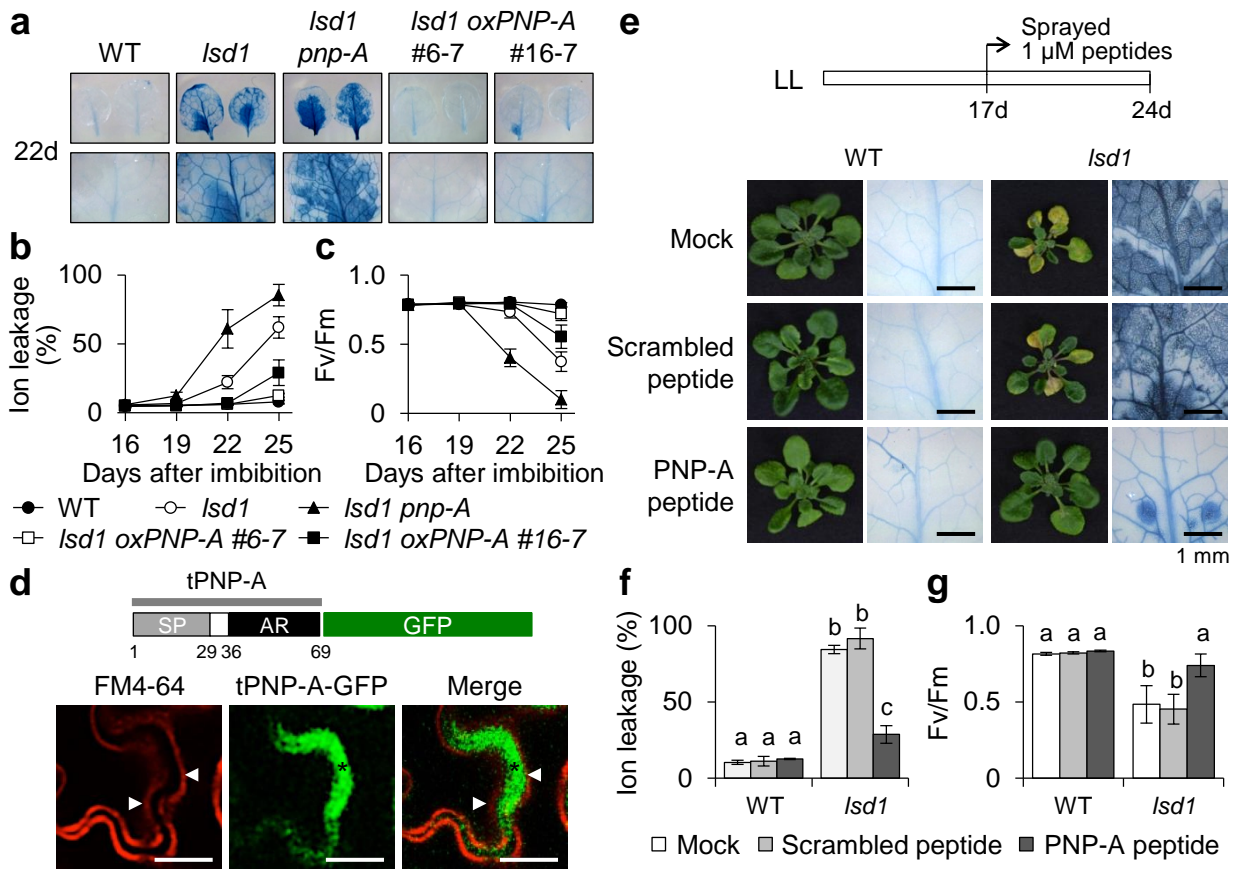

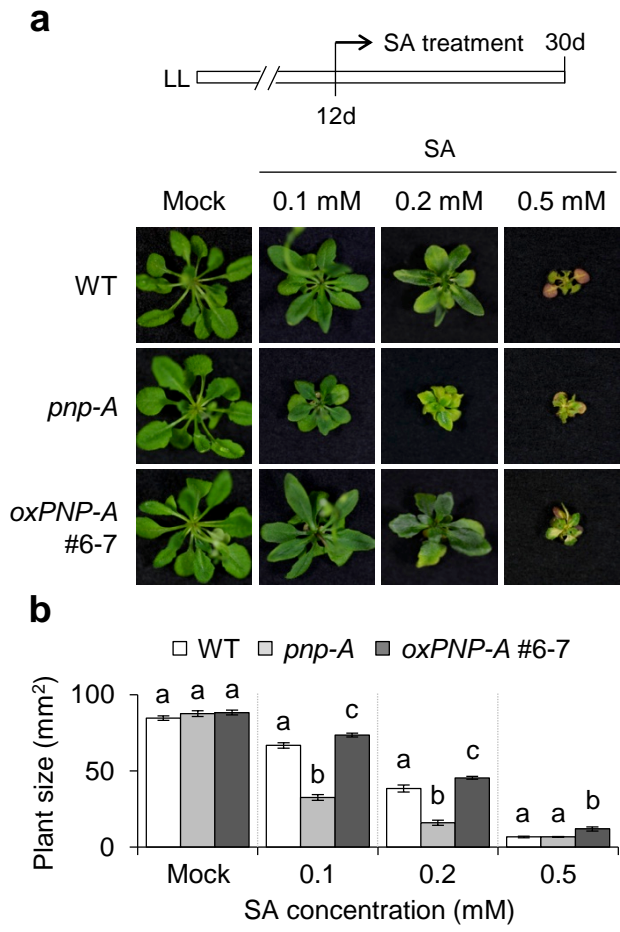



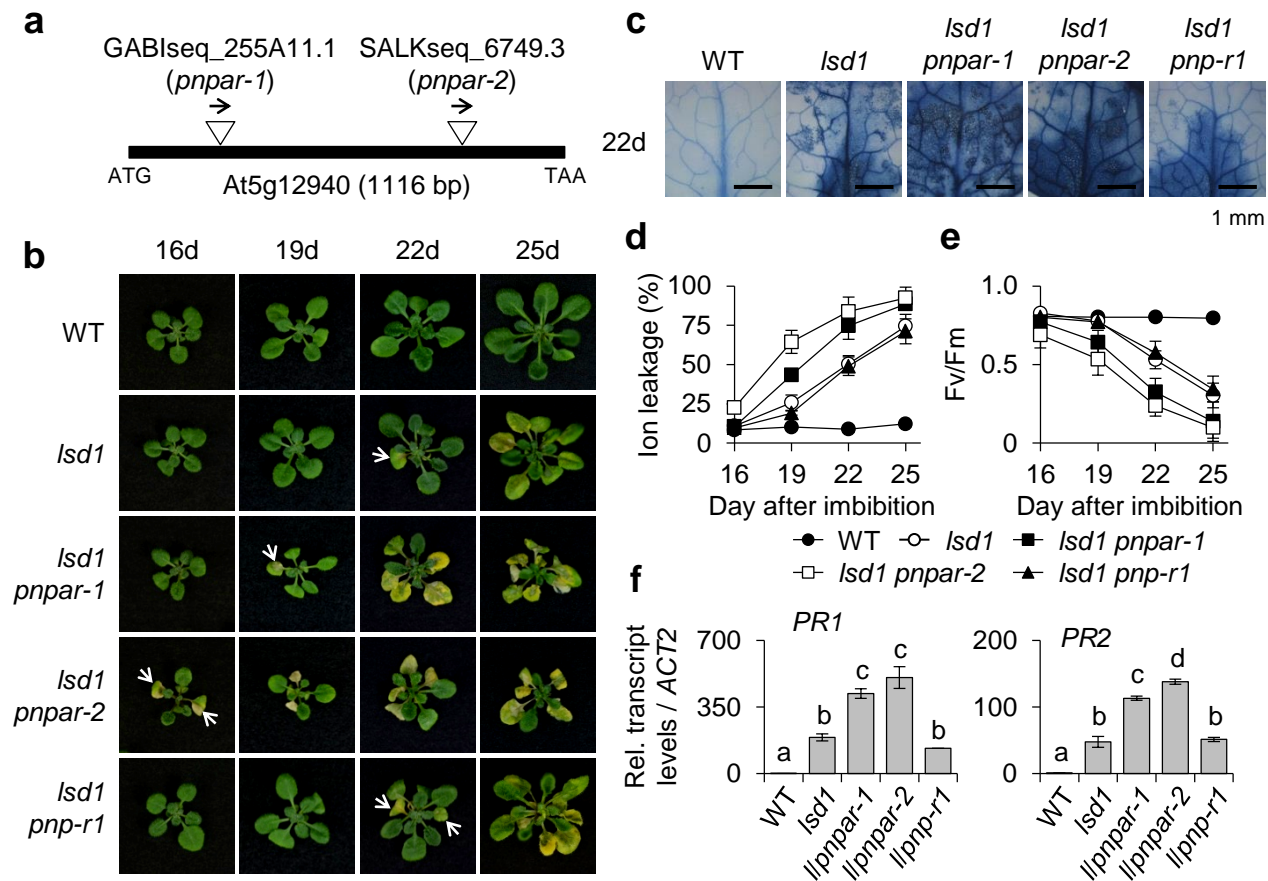



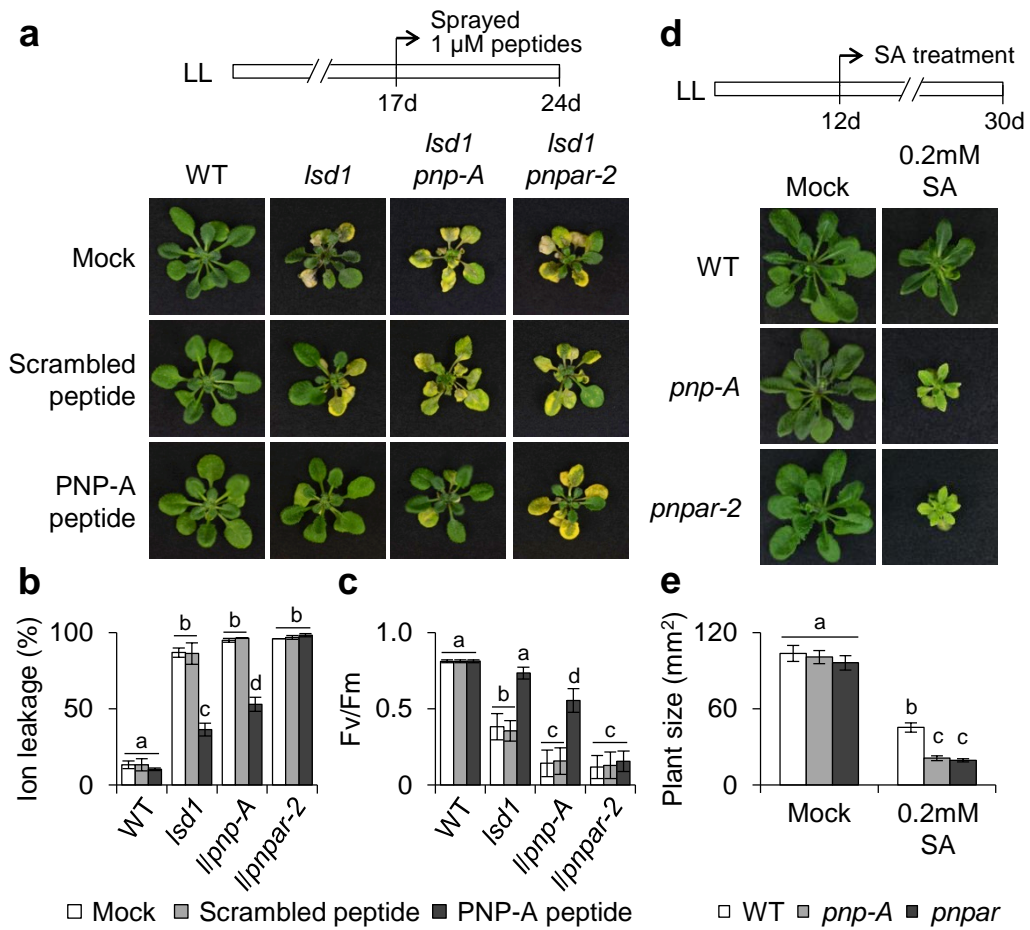

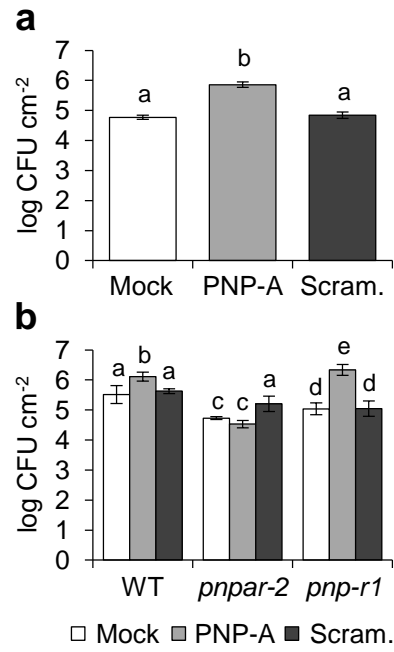

Source: http://biorxiv.org/content/10.1101/592881v1.full.pdf
